# Supplementary material for: CD133 expression is not restricted to stem cells, and both CD133+ and CD133– metastatic colon cancer cells initiate tumors
Source: JCI journal article supplement (doi:10.1172/jci34401), 2008-05-01
Supplement: sd1 [file 1]

# Supplemental figure 1

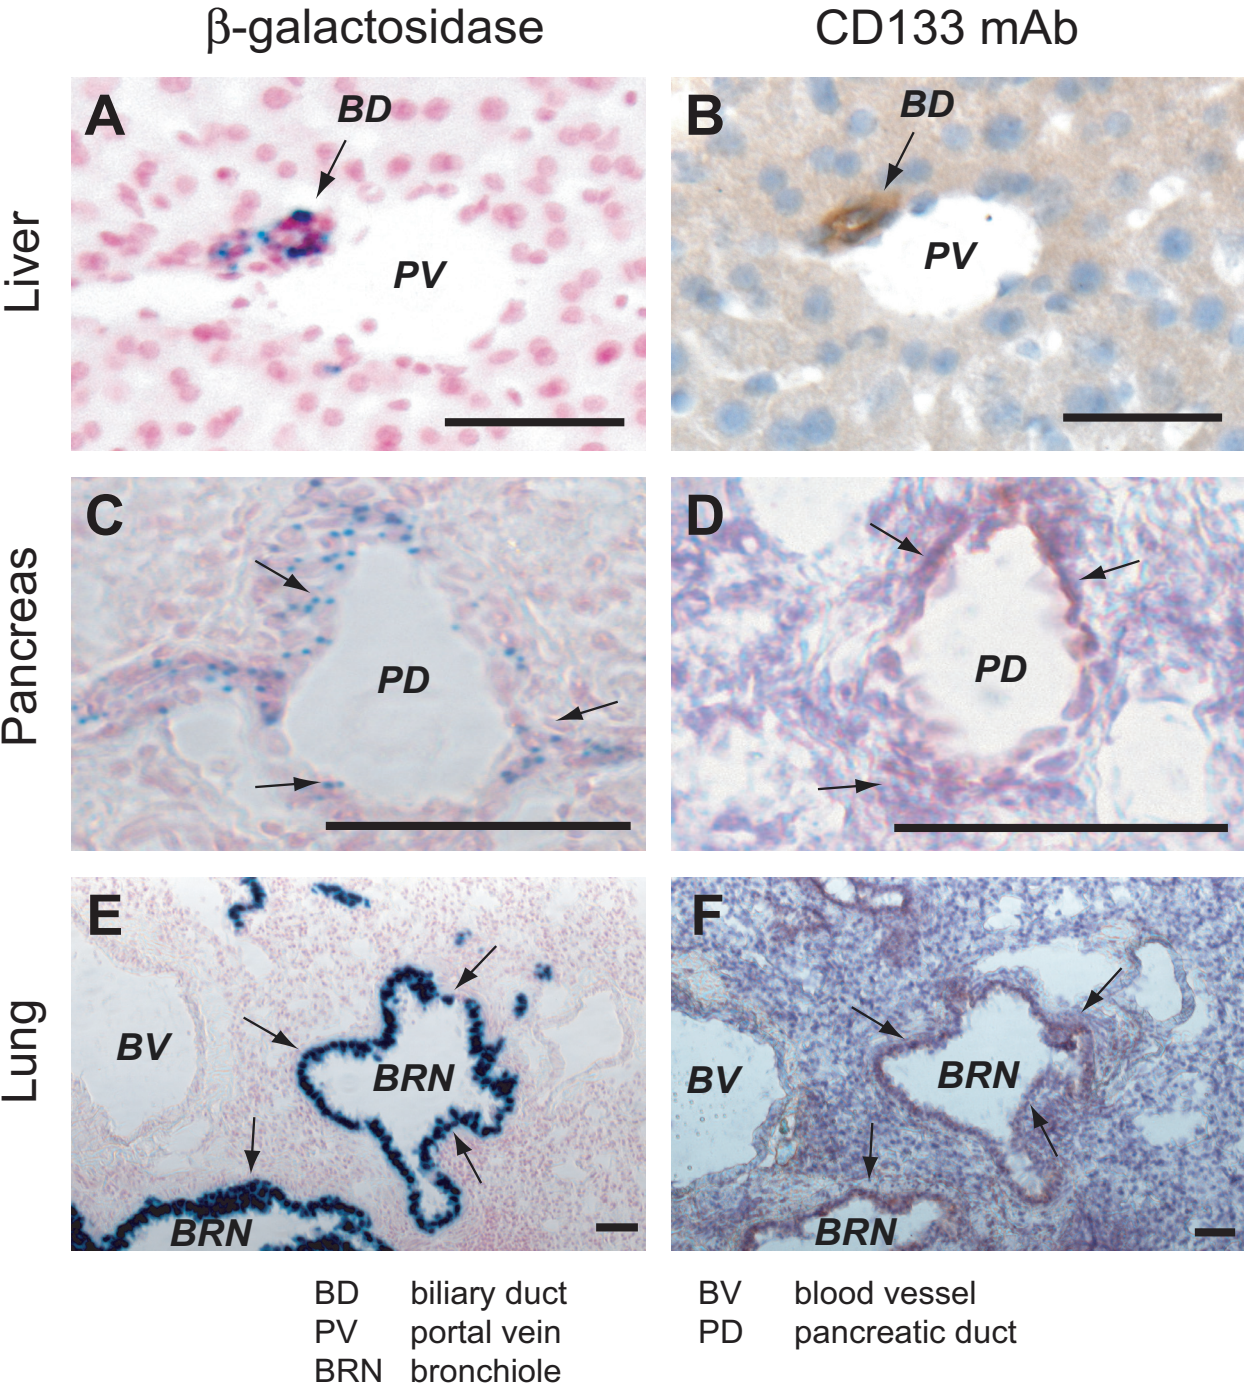

# Supplemental figure 2

Cecum

Sigmoid

Rectosigmoid #1

Rectosigmoid #2

IgG control

200X

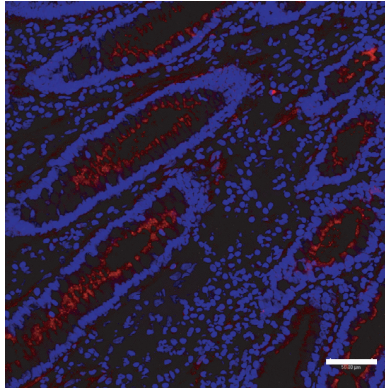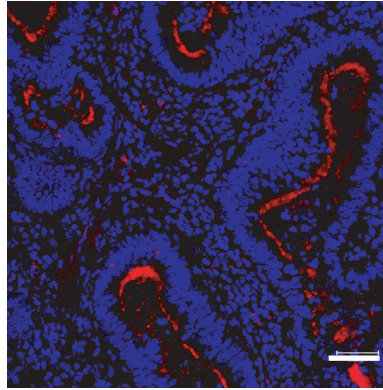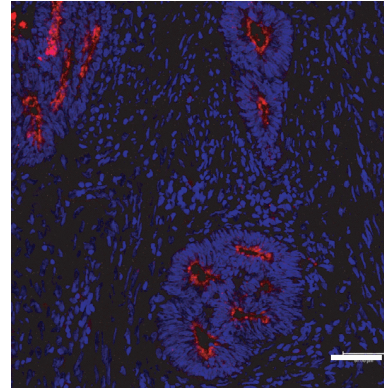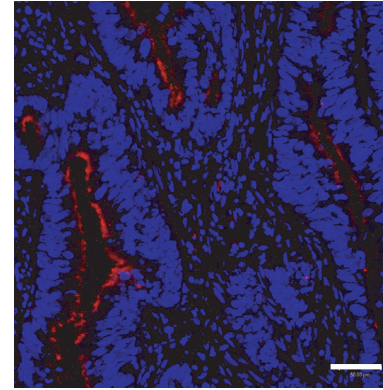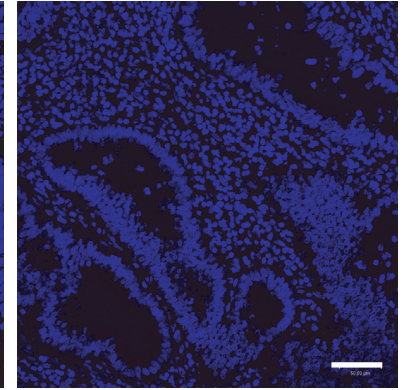

400X

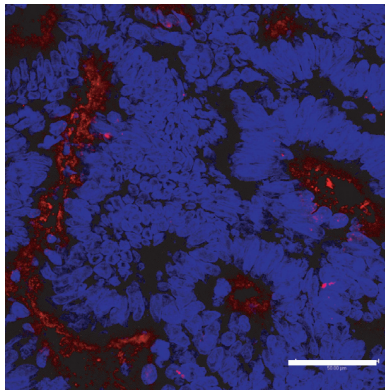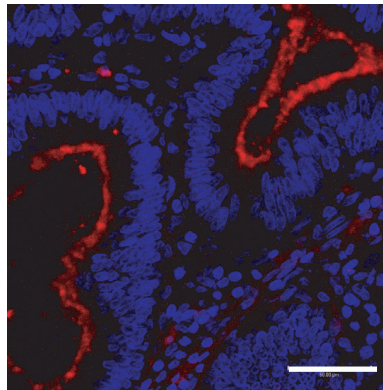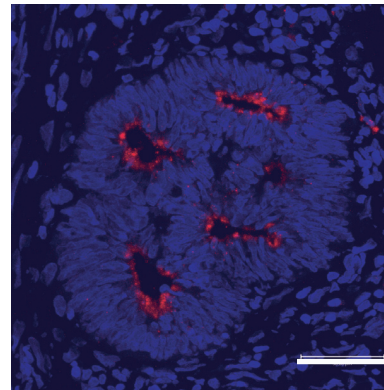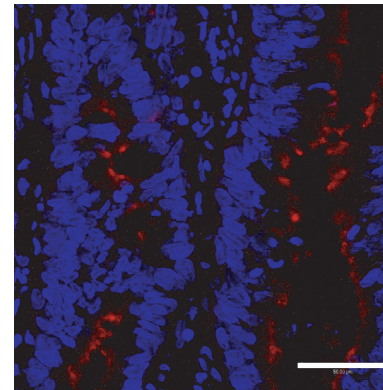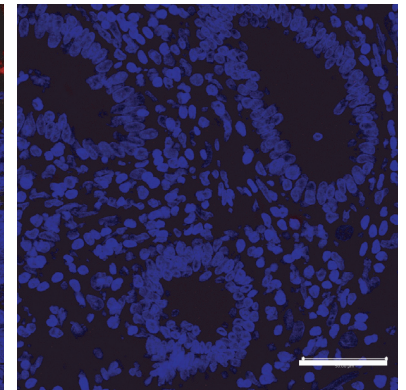

# Supplemental figure 2B

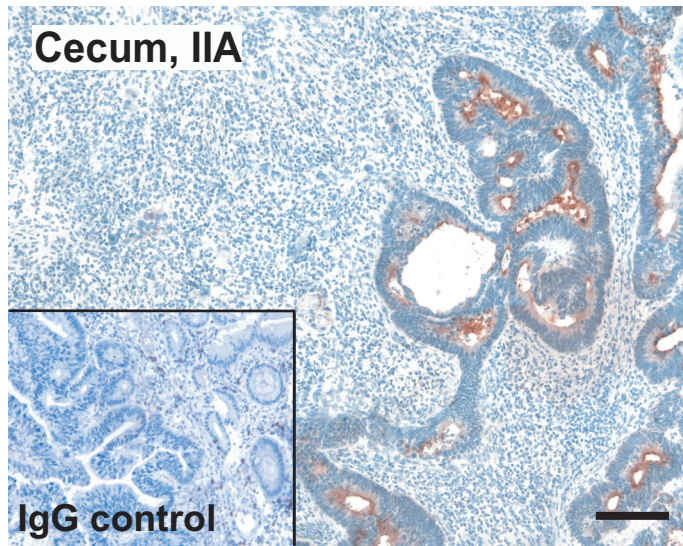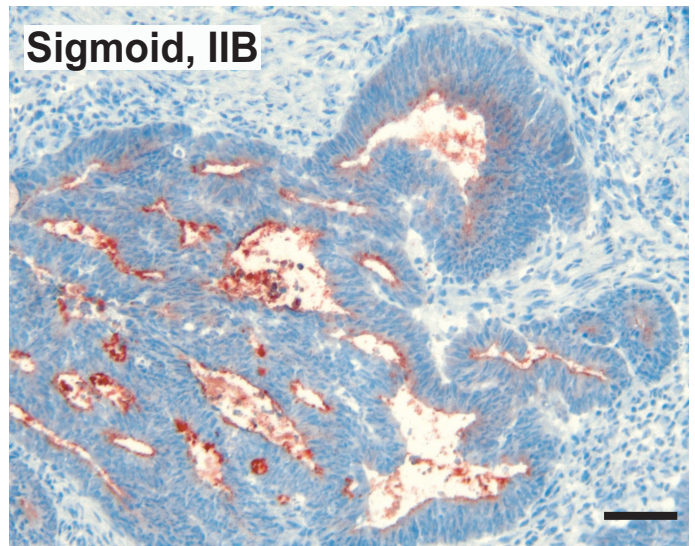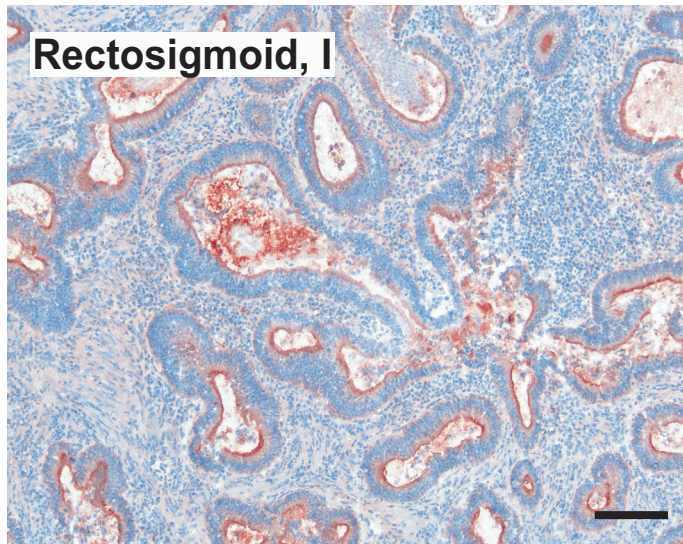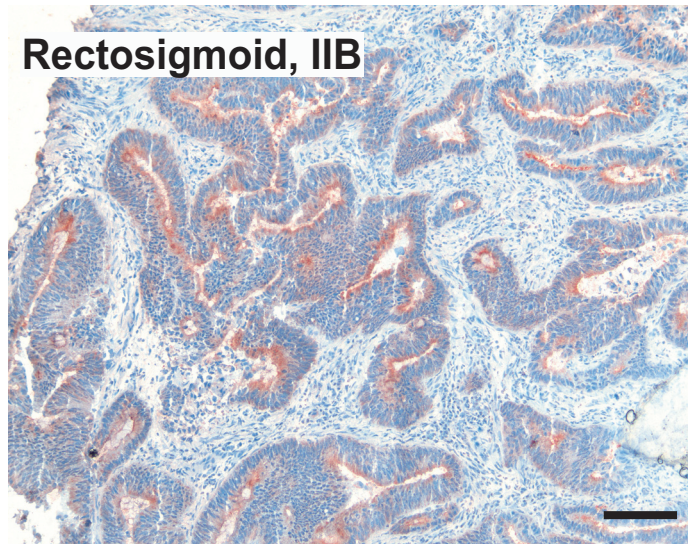

# Supplemental figure 3

**CD133(+) colon cancer metastasis to the liver**

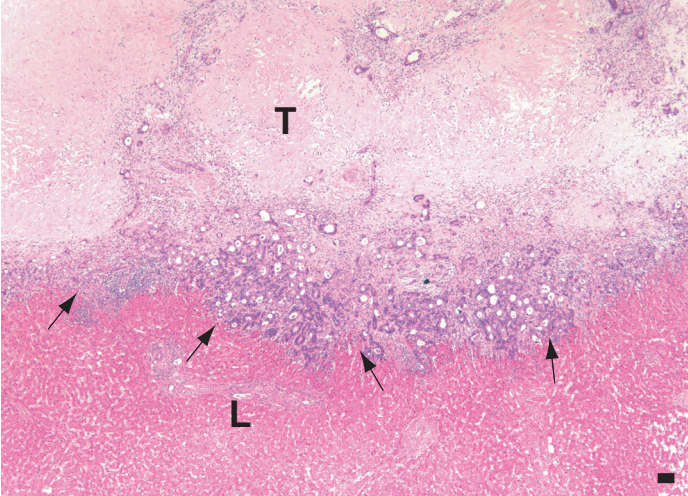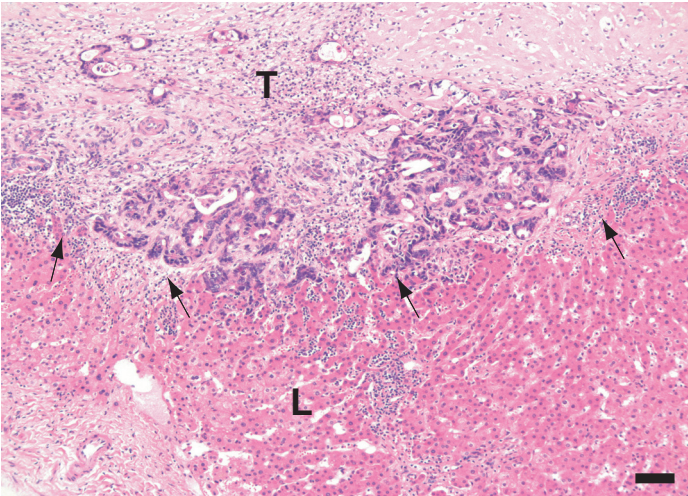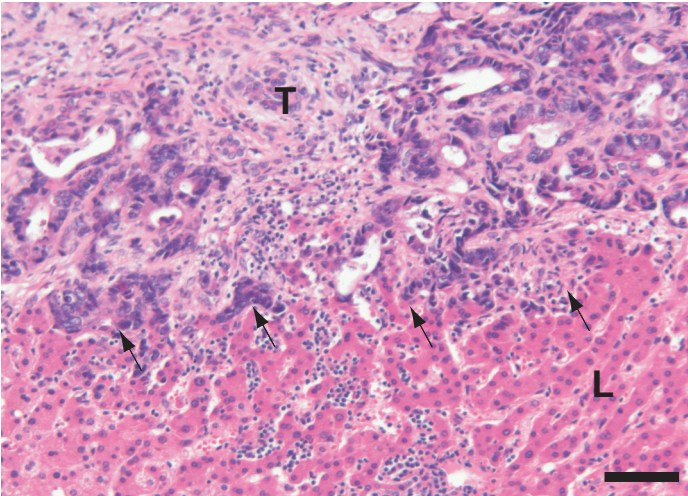

**CD133(-) colon cancer metastasis to the liver**

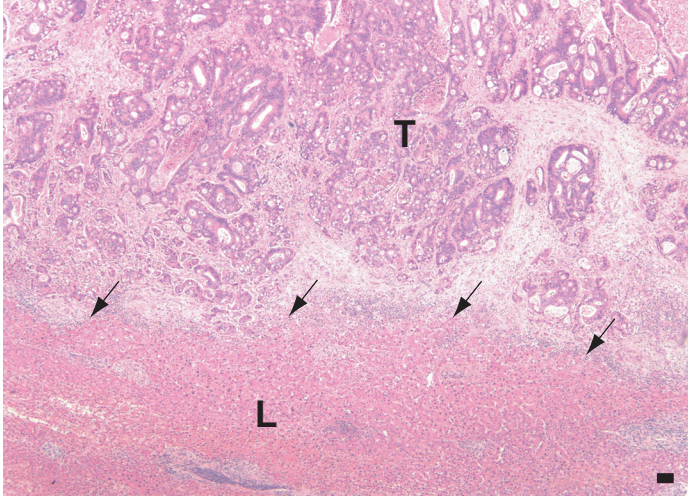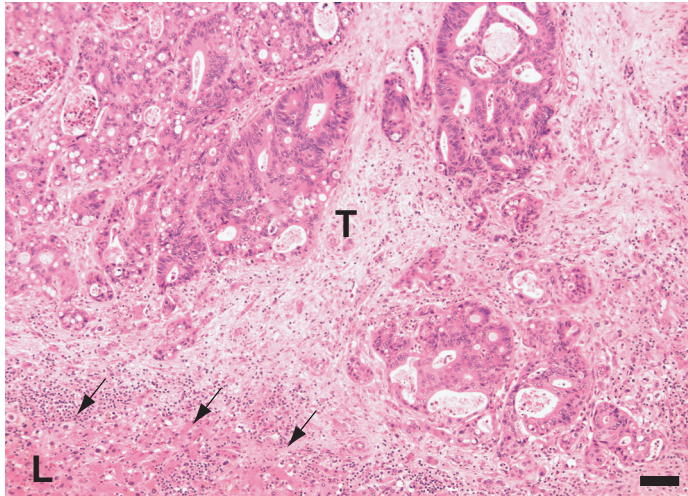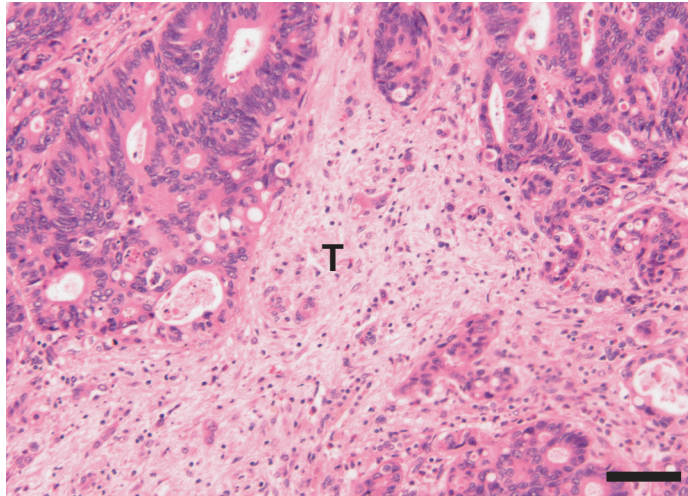

**Supplemental figure 1. Anti-CD133 monoclonal antibody and X-gal staining in CD133<sup>lacZ/+</sup> reporter mouse identify the same structures in tissues with luminal epithelium.** (A-B) CD133 expression in bile ducts of murine liver. X-gal staining of CD133<sup>lacZ/+</sup> mouse liver (A) and immunohistochemistry of the liver with anti-CD133 antibody on the adjacent section (B) co-localize CD133 expression to the same morphological structures. Arrows point to the epithelium of bile ducts. (C-D) CD133 expression in pancreatic ducts. X-gal staining of CD133<sup>lacZ/+</sup> mouse pancreas (C) and immunohistochemistry of the pancreas with anti-CD133 antibody on the adjacent section (D) co-localize CD133 expression to the same morphological structures. Arrows point to the epithelium of pancreatic ducts. (E-F) CD133 expression in bronchus. X-gal staining of CD133<sup>lacZ/+</sup> mouse lung (E) and immunohistochemistry of wild type mouse lung with anti-CD133 antibody on the adjacent section (F) co-localize CD133 expression to the same morphological structures. Arrows point to the bronchial epithelium. *PV* – portal vein; *BV* – blood vessel; *PD* – pancreatic duct; *BRN* – bronchus. Scale bar: 50  $\mu$ m.

**Supplemental figure 2. CD133 is broadly expressed in human primary colon cancer.** CD133 expression is shown with anti-CD133 antibody (red). Note that all luminal colonic epithelium is CD133<sup>+</sup> in primary colon tumors. CD133 expression is detected in primary tumors from all regions of the colon, including cecum, sigmoid and rectosigmoid. (A) Immunofluorescent staining; (B) chromagenic staining of different stages (I, IIA, IIB) of colon cancer. Scale bar: 50  $\mu$ m.

**Supplemental figure 3. Histology of the border zone between the tumor and the liver tissue in the CD133<sup>+</sup> and CD133<sup>-</sup> human metastatic colon cancer.** Sections were stained with hematoxylin and eosin. Arrows point to the border zone, L -liver tissue, T – colon cancer metastasis to the liver. Scale bar: 50  $\mu$ m.
